# Supplementary material
Source: PubMed Central journal article supplement (PMC6800811)
Supplement: NIHMS1045965-supplement-Supp_AppendixS1.pdf [file NIHMS1045965-supplement-Supp_AppendixS1.pdf]

# Appendix for Bayesian additive regression trees and the General BART model

Yaoyuan Vincent Tan and Jason Roy

July 5, 2019

## A Parameters for BART

The parameters for continuous outcomes BART that needs to be set are:  $\alpha$ ,  $\beta$ ,  $\mu_\mu$ ,  $\sigma_\mu$ ,  $\nu$ , and  $\lambda$ . These parameters are constructed as a mix of apriori fixed and data-driven. For  $\alpha$  and  $\beta$ , the default values of  $\alpha = 0.95$  and  $\beta = 2$  provide a balanced penalizing effect for the probability of a node splitting (Chipman et al., 2010). For  $\mu_\mu$  and  $\sigma_\mu$ , they are set such that  $E[y|x] \sim N(m\mu_\mu, m\sigma_\mu^2)$  assigns high probability to the interval  $(\min(y), \max(y))$ . This can be achieved by defining  $v$  such that  $\min(y) = m\mu_\mu - v\sqrt{m}\sigma_\mu$  and  $\max(y) = m\mu_\mu + v\sqrt{m}\sigma_\mu$ . For ease of posterior distribution calculation,  $y$  is transformed to become  $\tilde{y} = \frac{y - \frac{\min(y) + \max(y)}{2}}{\max(y) - \min(y)}$ . This results in  $\tilde{y} \in (-0.5, 0.5)$  where  $\min(y) = -0.5$  and  $\max(y) = 0.5$ . This has the effect of allowing the hyperparameter  $\mu_\mu$  to be set as 0 and  $\sigma_\mu$  to be determined as  $\sigma_\mu = \frac{0.5}{v\sqrt{m}}$  where  $v$  is to be chosen. For  $v = 2$ ,  $N(m\mu_\mu, m\sigma_\mu^2)$  assigns a prior probability of 0.95 to the interval  $(\min(y), \max(y))$  and is the default value. Finally for  $\nu$  and  $\lambda$ , the default value for  $\nu$  is 3 and  $\lambda$  is the value such that  $P(\sigma^2 < s^2; \nu, \lambda) = 0.9$  where  $s^2$  is the estimated variance of the residuals from the multiple linear regression with  $y$  as the outcomes and  $x$  as the covariates.

For binary outcomes, the  $\alpha$  and  $\beta$  parameters are the same but the  $\mu_\mu$  and  $\sigma_\mu$  parameters are specified differently from continuous outcomes BART. To set the parameters for  $\mu_\mu$  and  $\sigma_\mu$ , we set  $\mu_\mu = 0$  and  $\sigma_\mu = \frac{3}{v\sqrt{m}}$  where  $v = 2$  would result in an approximate 95% probability that draws of  $f(x) = \sum_{j=1}^m g(x; T_j, M_j)$  will be within  $(-3.0, 3.0)$ . No transformation of the latent variable  $z$  would be needed although it should be noted that this setup shrinks  $f(x)$  toward 0 (See main paper Section 2.2).

## B Posterior distributions for $\mu_{ji}$ and $\sigma^2$ in BART

### B.1 $p(\mu_{ji}|T_j, \sigma, r_j)$

Let  $r_{ji} = (r_{ji1}, \dots, r_{jin_i})^T$  be a subset from  $r_j$  where  $n_i$  is the number of  $r_{jih}$ s allocated to the terminal node with parameter  $\mu_{ji}$  and  $h$  indexes the subjects allocated to the terminal

node with parameter  $\mu_{ji}$ . We note that  $r_{ji}|T_j, \mu_{ji}, \sigma \sim N(\mu_{ji}, \sigma^2)$  and  $\mu_{ji}|T_j \sim N(\mu_\mu, \sigma_\mu^2)$ . Then the posterior distribution of  $\mu_{ji}$  is given by

$$\begin{aligned}
p(\mu_{ji}|T_j, \sigma, r_j) &\propto p(r_{ji}|T_j, \mu_{ji}, \sigma)p(\mu_{ji}|T_j) \\
&\propto \exp\left[-\frac{\sum_h (r_{jih} - \mu_{ji})^2}{2\sigma^2}\right] \exp\left[-\frac{(\mu_{ji} - \mu_\mu)^2}{2\sigma_\mu^2}\right] \\
&\propto \exp\left[-\frac{(n_i\sigma_\mu^2 + \sigma^2)\mu_{ji}^2 - 2(\sigma_\mu^2 \sum_h r_{jih} + \sigma^2\mu_\mu)\mu_{ji}}{2\sigma^2\sigma_\mu^2}\right] \\
&\propto \exp\left[-\frac{(\mu_{ji} - \frac{\sigma_\mu^2 \sum_h r_{jih} + \sigma^2\mu_\mu}{n_i\sigma_\mu^2 + \sigma^2})^2}{2\frac{\sigma^2\sigma_\mu^2}{n_i\sigma_\mu^2 + \sigma^2}}\right]
\end{aligned}$$

where  $\sum_h (r_{jih} - \mu_{ji})^2$  is the summation of the squared difference between the parameter  $\mu_{ji}$  and the  $r_{jih}$ s allocated to the terminal node with parameter  $\mu_{ji}$ .

## B.2 $p(\sigma^2|(T_1, M_1), \dots, (T_m, M_m), y)$

Let  $y = (y_1, \dots, y_n)^T$  with  $\sigma^2 \sim IG(\frac{\nu}{2}, \frac{\nu\lambda}{2})$ . We obtain the posterior draw of  $\sigma$  as follows

$$\begin{aligned}
p(\sigma^2|(T_1, M_1), \dots, (T_m, M_m), y) &\propto p(y|(T_1, M_1), \dots, (T_m, M_m), \sigma)p(\sigma^2) \\
&= \left\{ \prod (\sigma^2)^{-\frac{1}{2}} \exp\left[-\frac{(y - f(x))^2}{2\sigma^2}\right] \right\} (\sigma^2)^{-(\frac{\nu}{2}+1)} \exp\left(-\frac{\nu\lambda}{2\sigma^2}\right) \\
&= (\sigma^2)^{-(\frac{\nu+n}{2}+1)} \exp\left[-\frac{\nu\lambda + \sum (y - f(x))^2}{2\sigma^2}\right].
\end{aligned}$$

## C Metropolis-Hastings ratio for the grow and prune step

This section is modified from Appendix A of Kapelner and Bleich (Kapelner and Bleich (2016)). Note that

$$\alpha(T_j, T_j^*) = \min \left\{ 1, \frac{q(T_j^*, T_j)}{q(T_j, T_j^*)} \frac{P(r_j|x, T_j^*, M_j)}{P(r_j|x, T_j, M_j)} \frac{P(T_j^*)}{P(T_j)} \right\}.$$

where  $\frac{q(T_j^*, T_j)}{q(T_j, T_j^*)}$  is the transition ratio,  $\frac{P(r_j|x, T_j^*, M_j)}{P(r_j|x, T_j, M_j)}$  is the likelihood ratio, and  $\frac{P(T_j^*)}{P(T_j)}$  is the tree structure ratio of Kapelner and Bleich, Appendix A. We now present the explicit formula for each ratio under the grow and prune proposal.

## C.1 Grow proposal

### C.1.1 Transition ratio

$q(T_j^*, T_j)$  indicates the probability of moving from  $T_j$  to  $T_j^*$  i.e. selecting and terminal node and growing two children from  $T_j$ . Hence,

$$\begin{aligned} P(T_j^*|T_j) &= P(\text{grow})P(\text{selecting terminal node to grow from}) \times \\ &\quad P(\text{selecting covariate to split from}) \times \\ &\quad P(\text{selecting value to split on}) \\ &= P(\text{grow}) \frac{1}{b_j} \frac{1}{p} \frac{1}{\eta}. \end{aligned}$$

In the above equation,  $P(\text{grow})$  can be decided by the researcher although the default provided is 0.25.  $b_j$  is the number of available terminal nodes to split on in  $T_j$ ,  $p$  is the number of variables left in the partition of the chosen terminal node, and  $\eta$  is the number of unique values left in the chosen variable after adjusting for the parents splits.

$q(T_j, T_j^*)$  on the other hand indicates a pruning move which involves the probability of selecting the correct internal node to prune on such that  $T_j^*$  becomes  $T_j$ . This is given as

$$\begin{aligned} P(T_j|T_j^*) &= P(\text{prune})P(\text{selecting the correct internal node to prune}) \\ &= P(\text{prune}) \frac{1}{w_2^*} \end{aligned}$$

where  $w_2^*$  denotes the number of internal nodes which have only two children terminal nodes.

This gives a transition ratio of

$$\frac{q(T_j^*, T_j)}{q(T_j, T_j^*)} = \frac{P(T_j^*|T_j)}{P(T_j|T_j^*)} = \frac{P(\text{prune})}{P(\text{grow})} \frac{b_j p \eta}{w_2^*}.$$

If there are no variables with two or more unique values, this transition ratio will be set to 0.

### C.1.2 Likelihood ratio

Since the rest of the tree structure will be the same between  $T_j^*$  and  $T_j$  except for the terminal node where the two children are grown, we need only concentrate on this terminal node. Let  $l$  be the selected node and  $l_L$  and  $l_R$  be the two children of the grow step. Then

$$\begin{aligned} \frac{P(r_j|x, T_j^*, M_j)}{P(r_j|x, T_j, M_j)} &= \frac{P(r_{l_{(L,1)},j}, \dots, r_{l_{(L,n_L)},j}|\sigma^2)P(r_{l_{(R,1)},j}, \dots, r_{l_{(R,n_R)},j}|\sigma^2)}{P(r_{1,j}, \dots, r_{n_l,j}|\sigma^2)} \\ &= \sqrt{\frac{\sigma^2(\sigma^2 + n_l\sigma_\mu^2)}{(\sigma^2 + n_L\sigma_\mu^2)(\sigma^2 + n_R\sigma_\mu^2)}} \exp \left[ \frac{\sigma_\mu^2}{2\sigma^2} \left( \frac{(\sum_{k=1}^{n_L} r_{l_{(L,k)},j})^2}{\sigma^2 + n_L\sigma_\mu^2} \right. \right. \\ &\quad \left. \left. + \frac{(\sum_{k=1}^{n_R} r_{l_{(R,k)},j})^2}{\sigma^2 + n_R\sigma_\mu^2} - \frac{(\sum_{k=1}^{n_l} r_{l_{(l,k)},j})^2}{\sigma^2 + n_l\sigma_\mu^2} \right) \right]. \end{aligned}$$

### C.1.3 Tree structure ratio

Because the  $T_j$  can be specified using three aspects, we let  $P_{SPLIT}(\theta)$  denote the probability that a selected node  $\theta$  will split and  $P_{RULE}(\theta)$  denote the probability that a certain variable and value is selected. Then based on  $P_{SPLIT}(\theta) \propto \frac{\alpha}{(1+d_\theta)^\beta}$  and because  $T_j$  and  $T_j^*$  only differs at the children nodes, we have

$$\begin{aligned}
\frac{P(T_j^*)}{P(T_j)} &= \frac{\prod_{\theta \in H_{terminals}^*} (1 - P_{SPLIT}(\theta)) \prod_{\theta \in H_{internals}^*} P_{SPLIT}(\theta) \prod_{\theta \in H_{internals}^*} P_{RULE}(\theta)}{\prod_{\theta \in H_{terminals}} (1 - P_{SPLIT}(\theta)) \prod_{\theta \in H_{internals}} P_{SPLIT}(\theta) \prod_{\theta \in H_{internals}} P_{RULE}(\theta)} \\
&= \frac{[1 - P_{SPLIT}(\theta_L)][1 - P_{SPLIT}(\theta_R)]P_{SPLIT}(\theta)P_{RULE}(\theta)}{1 - P_{SPLIT}(\theta)} \\
&= \frac{(1 - \frac{\alpha}{(1+d_{\theta_L})^\beta})(1 - \frac{\alpha}{(1+d_{\theta_R})^\beta})\frac{\alpha}{(1+d_\theta)^\beta}\frac{1}{p}\frac{1}{\eta}}{1 - \frac{\alpha}{(1+d_\theta)^\beta}} \\
&= \alpha \frac{(1 - \frac{\alpha}{(2+d_\theta)^\beta})^2}{[(1 + d_\theta)^\beta - \alpha]p\eta}
\end{aligned}$$

because  $d_{\theta_L} = d_{\theta_R} = d_\theta + 1$ .

## C.2 Prune proposal

Since prune is the direct opposite of the grow proposal, the explicit formula of  $\alpha(T_j, T_j^*)$  will just be the inverse of the grow proposal.

## References

- Chipman, H., George, E., and McCulloch, R. (2010). BART: Bayesian Additive Regression Trees. *The Annals of Applied Statistics* **4**, 266–298.
- Kapelner, A. and Bleich, J. (2016). bartMachine: Machine Learning with Bayesian Additive Regression Trees. *Journal of Statistical Software* **70**, 1–40.
